# Supplementary material for: Tuning the crystal growth of perovskite thin-films by adding the 2-pyridylthiourea additive for highly efficient and stable solar cells prepared in ambient air
Source: Royal Society of Chemistry journal article supplement (doi:10.1039/c7ta00894e), 2017-01-01
Supplement: c7ta00894e1.pdf [file c7ta00894e1.pdf]

## Supporting information

### Tuning the crystal-growth of perovskite thin-films by adding 2-pyridylthiourea additive for highly efficient and stable solar cells prepared in ambient air

Mengna Sun<sup>a,b</sup>, Fei Zhang<sup>a,b,\*</sup>, Hongli Liu<sup>a,b</sup>, Xianggao Li<sup>a,b</sup>, Yin Xiao<sup>a,b</sup>, Shirong Wang<sup>a,b,\*</sup>

*a* School of Chemical Engineering and Technology, Tianjin University, Tianjin 300354, China.

*b* Collaborative Innovation Center of Chemical Science and Engineering(Tianjin), Tianjin 300072, China.

\* Corresponding author: Email: [wangshirong@tju.edu.cn](mailto:wangshirong@tju.edu.cn); E-mail: [zhangf890206@tju.edu.cn](mailto:zhangf890206@tju.edu.cn).

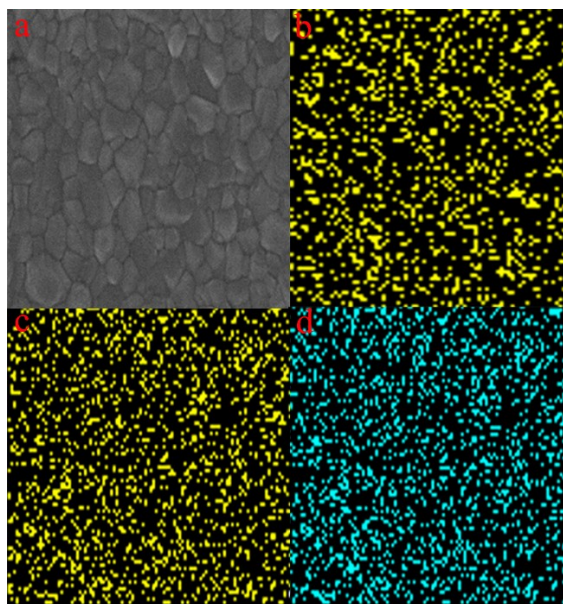

**Figure S1** (a)The surface SEM image of perovskite thin film with 2-pyridylthiourea at 0.5 mg mL<sup>-1</sup> on FTO; its EDS elemental mapping of (b) I, (c) S and (d) Pb.

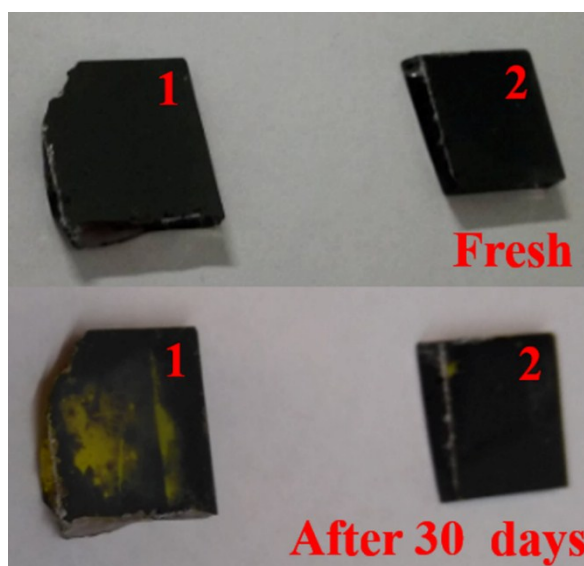

**Figure S2** The pictures of the corresponding thin films under ambient atmosphere with a relative humidity of 55±5 % at room temperature after aging for 30 days. 1: perovskite; 2: perovskite with 2-pyridylthiourea.

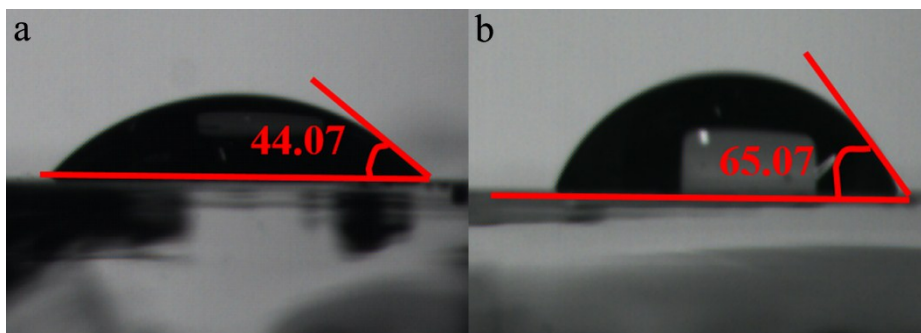

**Figure S3** The contact angles between H<sub>2</sub>O and (a) perovskite thin film, (b) perovskite thin film with 2-pyridylthiourea.
